# Supplementary material for: Molecular basis for the specific and multivariant recognitions of RNA substrates by human hnRNP A2/B1
Source: PubMed Central journal article supplement (PMC5789076; doi:10.1038/s41467-017-02770-z), 2018-01-29
Supplement: 41467_2017_2770_MOESM1_ESM.pdf [file 41467_2017_2770_MOESM1_ESM.pdf]

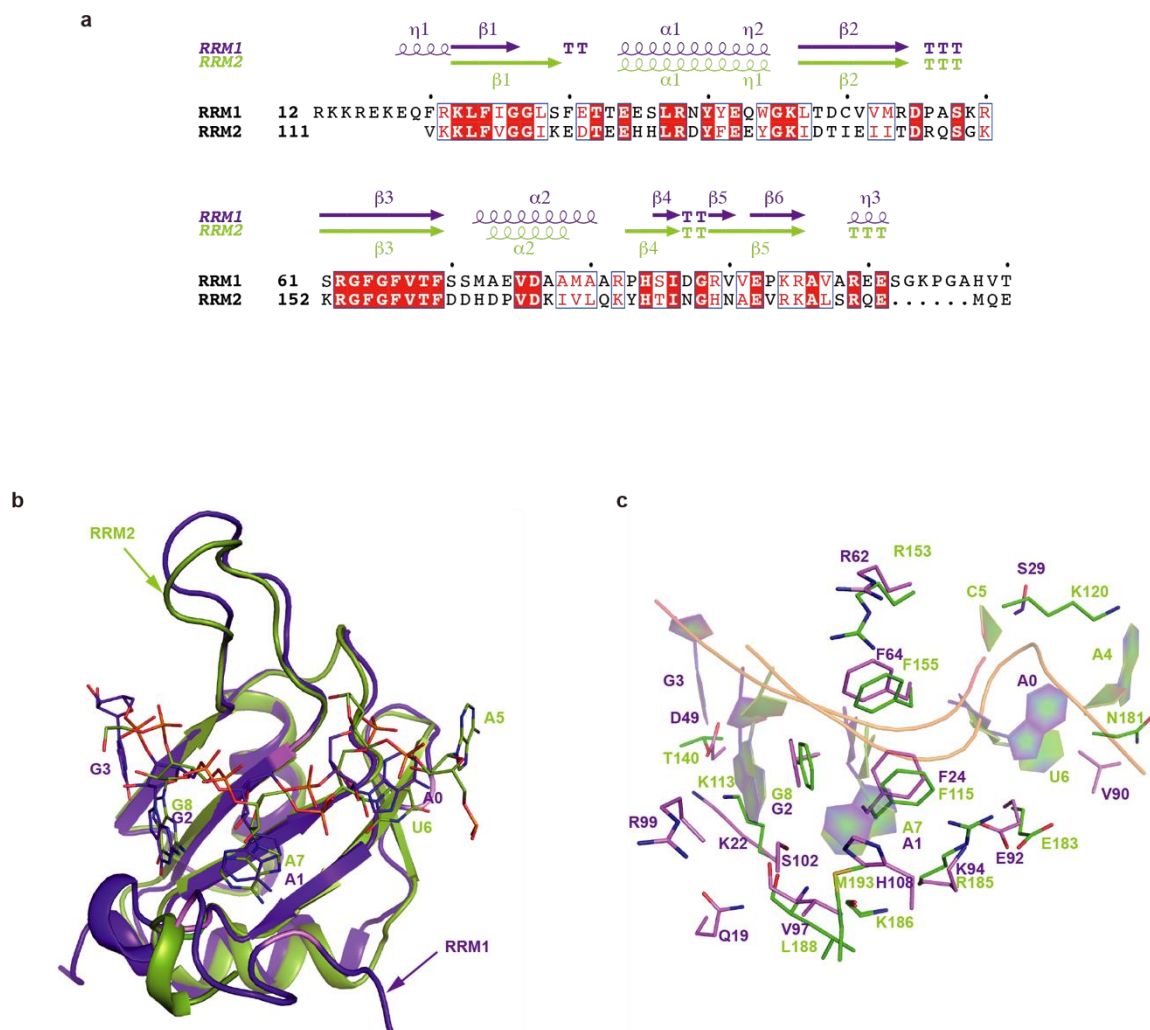

**Supplementary Figure 1. Superimposed of RRM1 and RRM2 in 10mer RNA complex**

(a) Sequence alignment between RRM1 and RRM2, the secondary structures are colored in purple-blue and green, respectively above the sequences. (b) Superposition of RRM1(12-110)-AAGG and RRM2(111-195)-ACUAGC.(c) Superposition of residues participated in RNA recognition in RRM1 and RRM2. The RNA chains are shown by cartoon.

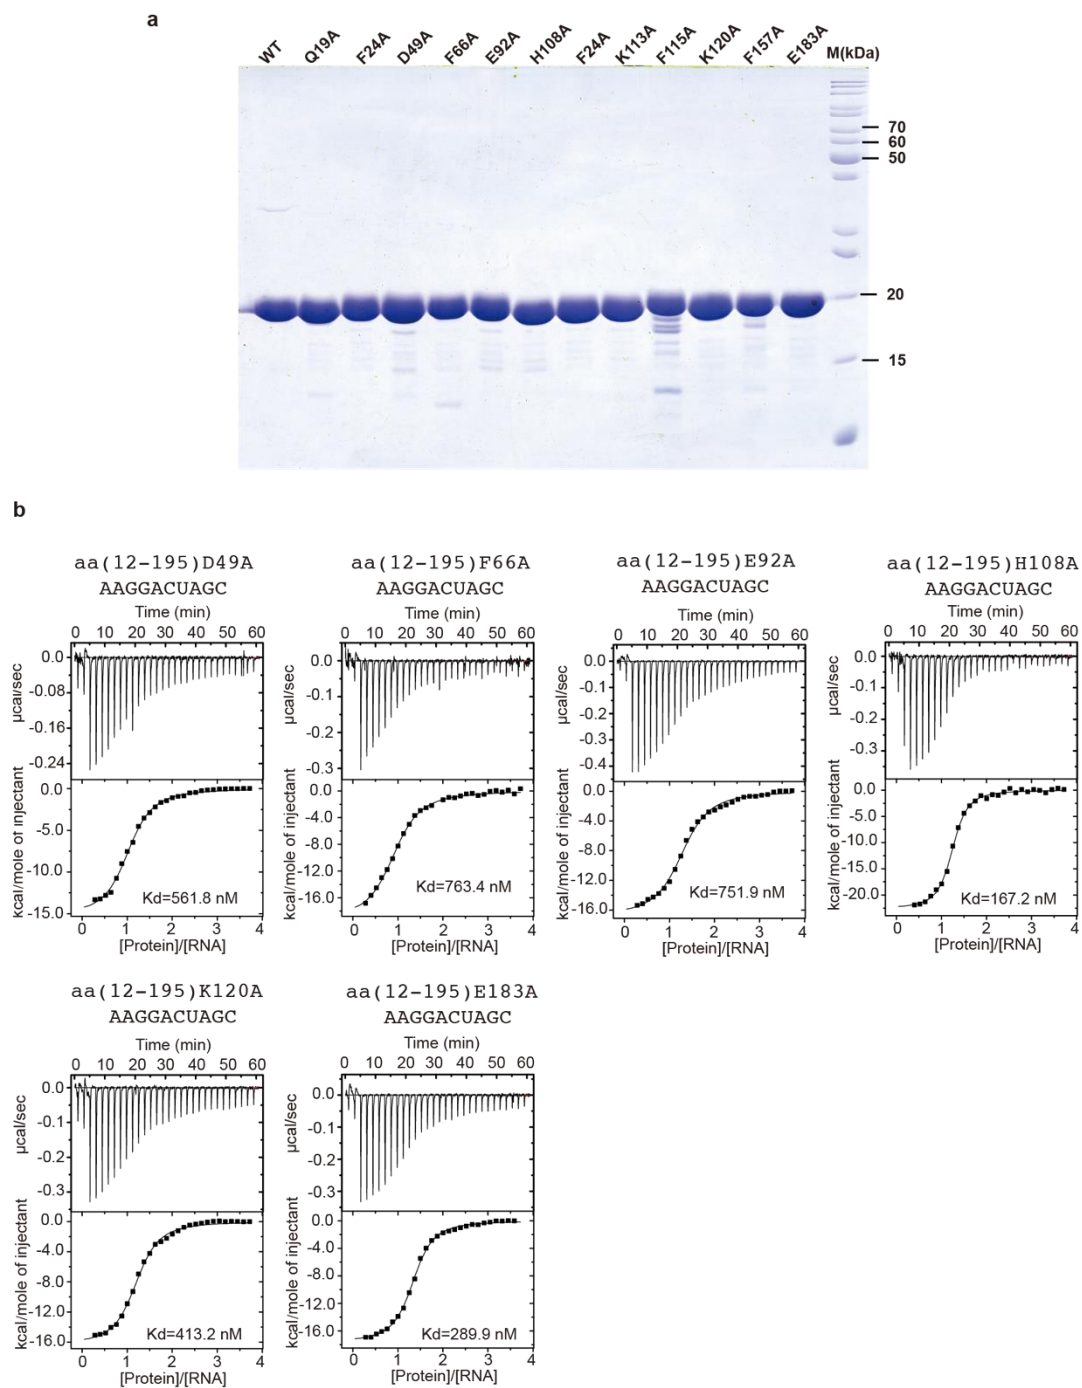

**Supplementary Figure 2. Mutagenesis study of RRM1 by ITC experiments**

(a) SDS-PAGE of wildtype and protein mutants. (b) ITC results of hnRNP A2/B1 mutants with 10mer RNA.

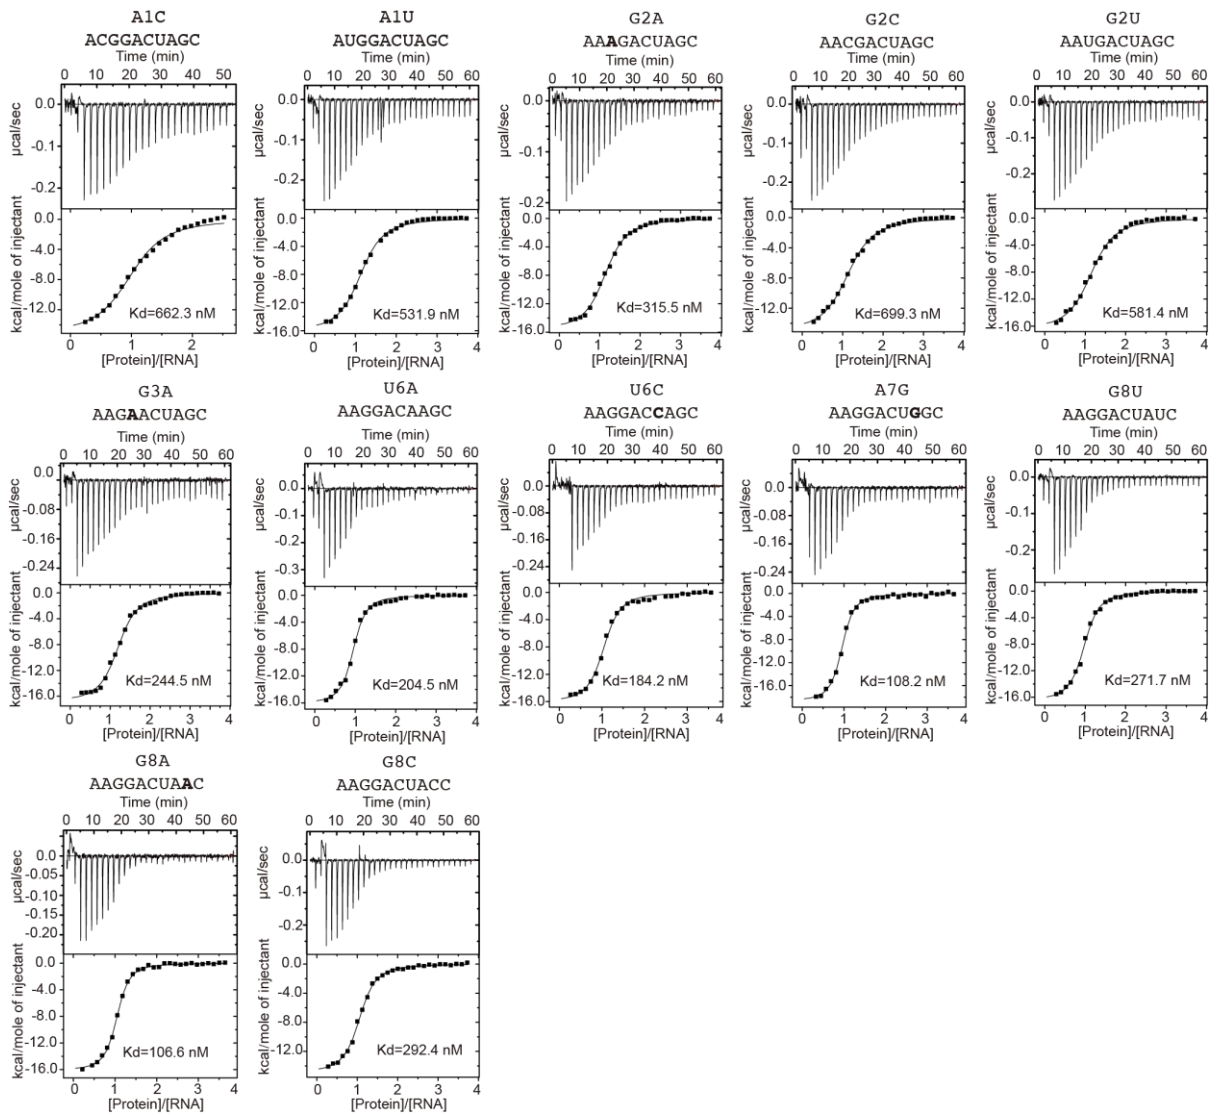

**Supplementary Figure 3. Mutagenesis study of RNA by ITC experiments.**

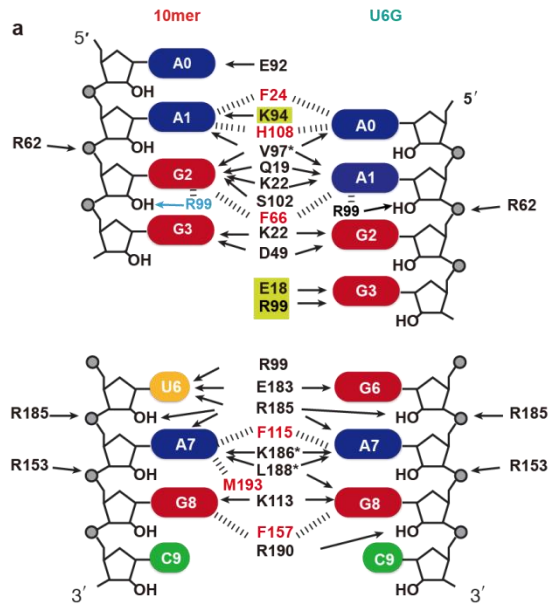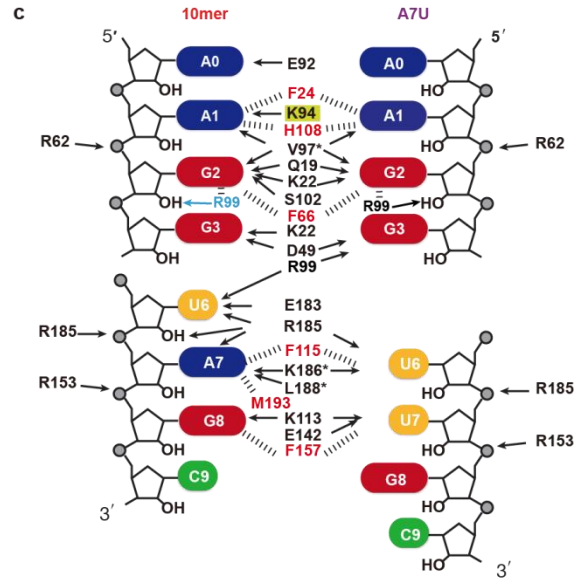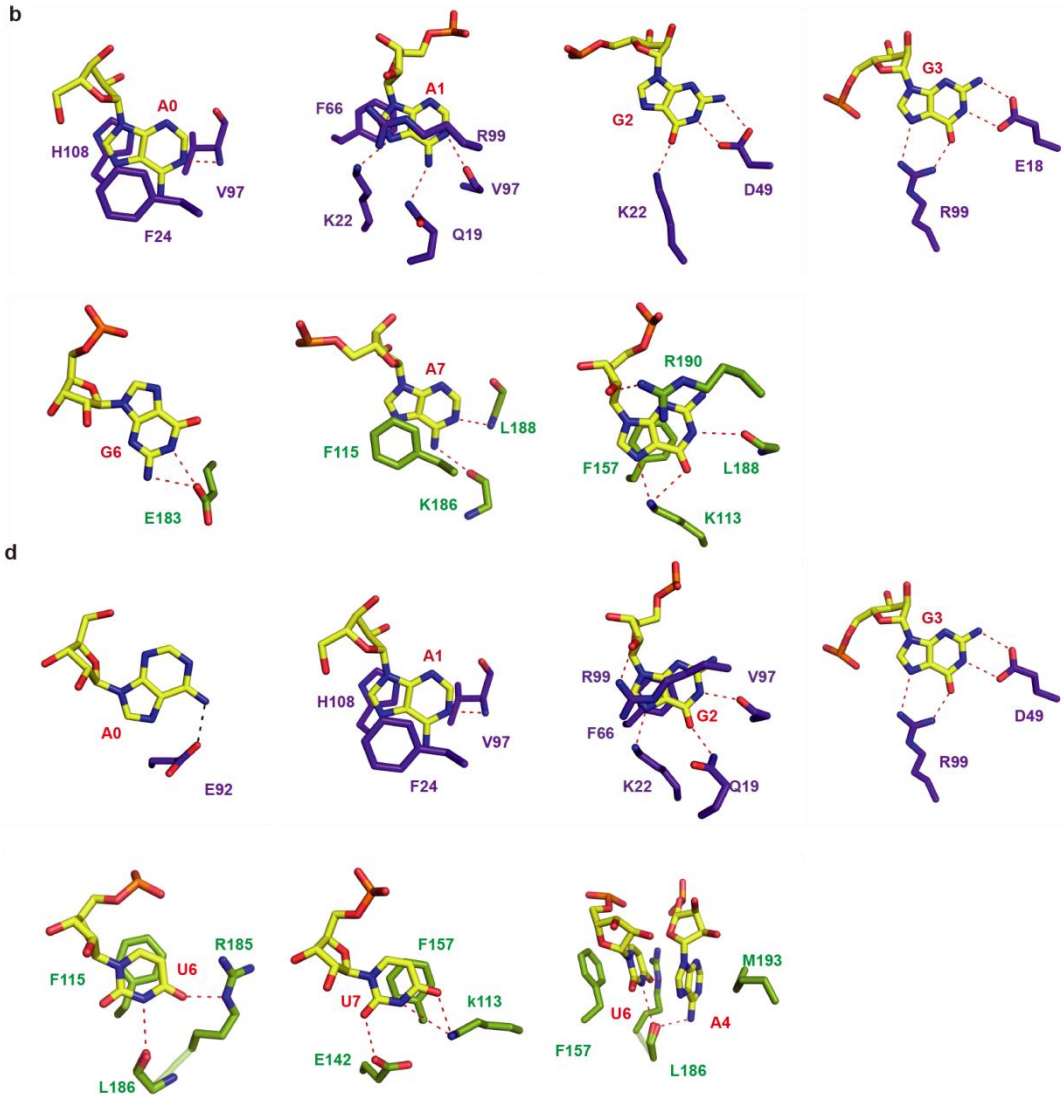

**Supplementary Figure 4. Schematic representations of RRMs interactions with RNA mutants.** (a) Close-up view showing the specific RNA recognition in U6G complex. (b) Comparison of detailed interactions between 10mer complex and U6G complex. (c) Close-up view showing the specific RNA recognition in A7U complex. (d) Comparison of detailed interactions between 10mer complex and A7U complex.

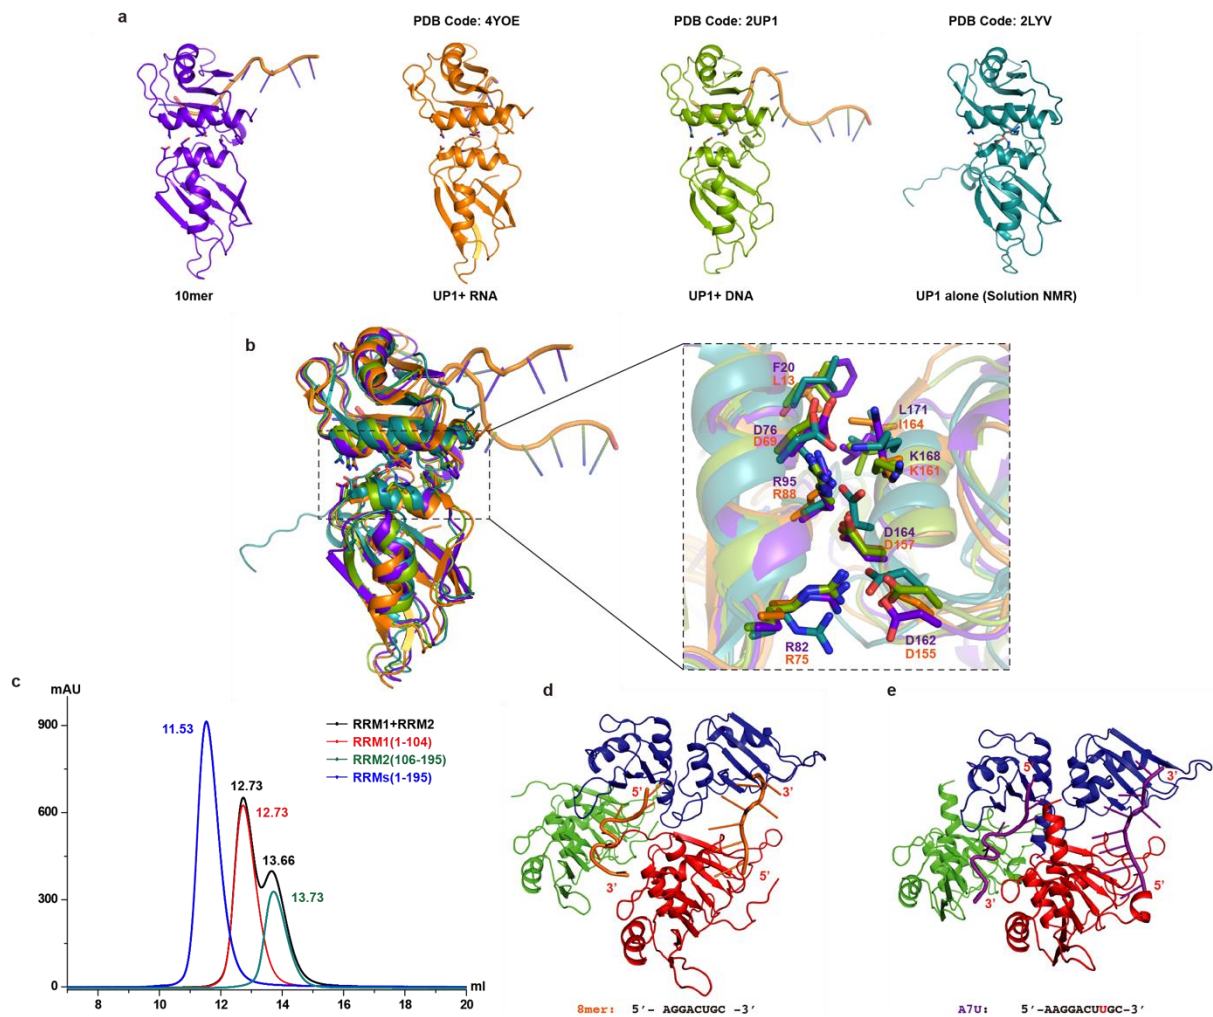

**Supplementary Figure 5. Crystal packing interactions.** (a) Structures of hnRNP A2/B1 with 10mer complex and hnRNP A1-RRMs (UP1) in different structural status. The UP1 in complex with RNA (PDB code: 4YOE) is colored in orange, the UP1 in complex with telomere DNA (PDB code: 2UP1) and solution structure of UP1 (PDB code: 2LYV) are colored in green and cyan, respectively. (b) Superposition of the structures listing in Supplementary Figure 5a reveals the conserve interactions between RRM1 and RRM2. The residues account for the interactions of inter-domain are shown as stick colored as above. (c) Gel-filtration binding assay for RRM1 and RRM2. Black curve: RRM1+RRM2; Red curve: RRM1; Green curve: RRM2; Blue curve: RRM1s(1-195). (d) Crystal packing interactions in 8mer. (e) Crystal packing interactions in A7U complex.

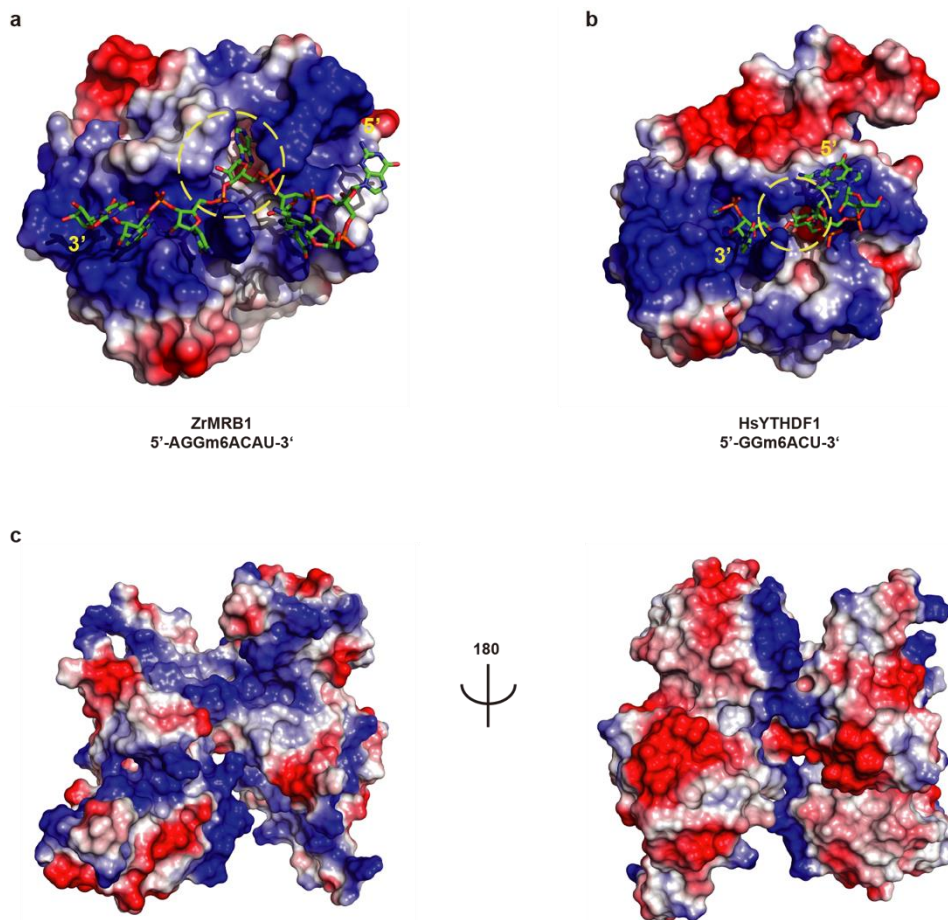

**Supplementary Figure 6. Surface charge comparison of *ZrMRB1*, *HsYTHDF1* and hnRNP A2/B1.** (a) Surface representation of *ZrMRB1* in complex with RNA containing m<sup>6</sup>A modification. The aromatic cage is circled with yellow dashline, RNA is shown by stick colored in green. (b) *HsYTHDF1* in complex with RNA containing m<sup>6</sup>A modification, RNA is shown by stick. (c) Surface representation of hnRNP A2/B1 RRMs in complex with 10mer RNA.

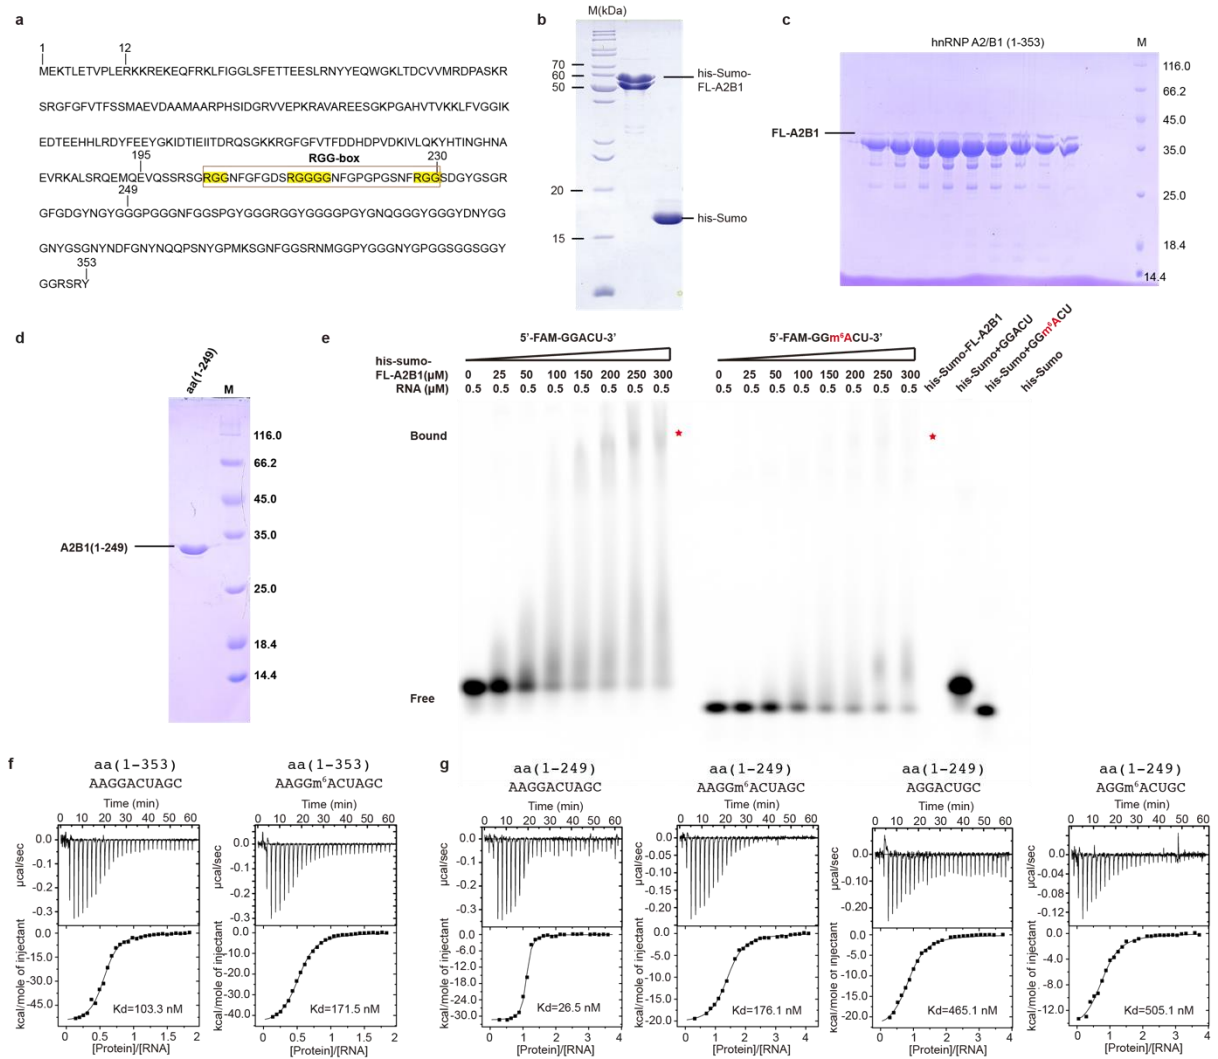

**Supplementary Figure 7. Full-length hnRNP A2/B1 does not specifically recognize m<sup>6</sup>A-modified RNA.** (a) Sequence of full-length hnRNP A2/B1 with RGG-box (203-230) colored in yellow enclosed with rectangle. (b) SDS-PAGE of full-length hnRNP A2/B1 with his-sumo tag. (c) SDS-PAGE of full-length hnRNP A2/B1 without tag. (d) SDS-PAGE of hnRNP A2/B1(aa 1-249) containing the RGG-box. (e) EMSA result of full-length hnRNP A2/B1 and 5'-FAM-labeled RNA substrates with or without m<sup>6</sup>A modification. (f) ITC results of full-length hnRNP A2/B1 with various RNA substrates. (g) ITC results of hnRNP A2/B1(aa 1-249) with various RNA substrates.



**Supplementary Table 1.** Data collection and refinement statistics.

|                                                     | aa (12-195) and<br>8mer AGGACUGC | aa (12-195) and<br>10mer<br>AAGGACUAGC | aa (12-195) and<br>A1G<br>AGGGACUAGC | aa (12-195) and<br>U6G<br>AAGGACGAGC | aa (12-195) and<br>G7U<br>AAGGACUUGC |
|-----------------------------------------------------|----------------------------------|----------------------------------------|--------------------------------------|--------------------------------------|--------------------------------------|
| <b>Data collection</b>                              |                                  |                                        |                                      |                                      |                                      |
| Space group                                         | C2 <sub>1</sub>                  | C2 <sub>1</sub>                        | P4 <sub>3</sub>                      | P2 <sub>1</sub>                      | C2 <sub>1</sub>                      |
| Cell dimensions                                     |                                  |                                        |                                      |                                      |                                      |
| <i>a</i> , <i>b</i> , <i>c</i> (Å)                  | 122.623, 46.38,<br>37.516        | 109.604,<br>38.959,70.442              | 62.591, 62.591,<br>53.043            | 49.351, 38.301,<br>107.931           | 132.810, 46.228,<br>33.994           |
| $\alpha, \beta, \gamma$ , (°)                       | 90, 96.02, 90                    | 90, 116.26, 90                         | 90, 90, 90                           | 90, 92.43, 90                        | 90, 102.22, 90                       |
| Wavelength(Å)                                       | 0.97776                          | 0.97776                                | 0.97776                              | 0.97776                              | 0.97776                              |
| Resolution (Å)                                      | 28.81-2.60(2.64-<br>2.6)         | 63.17-1.85 (1.917-<br>1.851)           | 30.00-2.40(2.44-<br>2.40)            | 30.00-2.15(2.23-<br>2.15)            | 30-2.03(2.082-<br>2.030)             |
| <i>R</i> <sub>merge</sub>                           | 0.119                            | 0.057                                  | 0.104                                | 0.137                                | 0.131                                |
| <i>I</i> / $\sigma$ <i>I</i>                        | 7.9 (1.5)                        | 18.4 (2.1)                             | 32.75(2.33)                          | 11.0(2.25)                           | 15.81(2.4)                           |
| Completeness (%)                                    | 93.4 (82.0)                      | 92.43(55.36)                           | 100.0(100)                           | 96.8(87.9)                           | 97.2(94.0)                           |
| Redundancy                                          | 2.5                              | 2.9                                    | 13.4                                 | 4.7                                  | 4.9                                  |
| <b>Refinement</b>                                   |                                  |                                        |                                      |                                      |                                      |
| Resolution (Å)                                      | 2.6                              | 1.85                                   | 2.4                                  | 2.15                                 | 2.03                                 |
| No. reflections                                     | 15240 (461)                      | 21311(1255)                            | 8124(392)                            | 21583(1917)                          | 14087(1172)                          |
| <i>R</i> <sub>work</sub> / <i>R</i> <sub>free</sub> | 0.1916/0.2362                    | 0.1839/0.2227                          | 0.22436/.27434                       | 0.20255/0.25772                      | 0.20145/0.25628                      |
| No.atoms                                            | 1652                             | 1796                                   | 1637                                 | 3399                                 | 1734                                 |
| Protein                                             | 1493                             | 1470                                   | 1433                                 | 2903                                 | 1522                                 |
| RNA                                                 | 149                              | 193                                    | 198                                  | 436                                  | 169                                  |
| Water                                               | 10                               | 134                                    | 6                                    | 60                                   | 33                                   |
| Average <i>B</i> -factor<br>(Å)                     | 45.5                             | 23.57                                  | 68.279                               | 29.476                               | 42.795                               |
| <b>R.m.s. deviations</b>                            |                                  |                                        |                                      |                                      |                                      |
| Bond lengths (Å)                                    | 0.012                            | 1.018                                  | 0.012                                | 0.013                                | 0.016                                |
| Bond angles (°)                                     | 1.7                              | 1.95                                   | 1.581                                | 1.757                                | 1.831                                |
| <b>Ramachandran<br/>plot</b>                        |                                  |                                        |                                      |                                      |                                      |
| Favored/allowed/<br>disallowed(%)                   | 96.00/4.00/0.00                  | 99.00/1.00/0.00                        | 94.51/2.44/3.05                      | 98.21/0.9/0.9                        | 98.27/0.58/1.16                      |

**Supplementary Table 2. Summary of ITC results**

| RNA substrates                                      | Protein                   | Kd              | n     |
|-----------------------------------------------------|---------------------------|-----------------|-------|
| 8mer: AGGACUGC                                      | hnRNP A2/B1 (12-195)      | 276.2 ± 27.5 nM | 0.826 |
| 10mer: AAGGACUAGC                                   | hnRNP A2/B1 (12-195)      | 114.7 ± 11.5 nM | 1.09  |
| 10mer-m <sup>6</sup> A: AAGG(m <sup>6</sup> A)CUAGC | hnRNP A2/B1 (12-195)      | 1.32 ± 0.143 μM | 0.948 |
| 8mer-m <sup>6</sup> A: AGG(m <sup>6</sup> A)CUGC    | hnRNP A2/B1 (12-195)      | 460.8 ± 47.4 nM | 0.963 |
| A1G: A <u>G</u> GGACUAGC                            | hnRNP A2/B1 (12-195)      | 534.8 ± 40.3 nM | 1.01  |
| A1C: A <u>C</u> GGACUAGC                            | hnRNP A2/B1 (12-195)      | 662.3 ± 54.3 nM | 1.02  |
| A1U: A <u>U</u> GGACUAGC                            | hnRNP A2/B1 (12-195)      | 531.9 ± 66.7 nM | 1.14  |
| G2A: AA <u>G</u> ACUAGC                             | hnRNP A2/B1 (12-195)      | 315.5 ± 37.0 nM | 1.14  |
| G2C: AA <u>C</u> ACUAGC                             | hnRNP A2/B1 (12-195)      | 699.3 ± 88.5 nM | 1.17  |
| G2U: AA <u>U</u> ACUAGC                             | hnRNP A2/B1 (12-195)      | 581.4 ± 58.1 nM | 1.17  |
| G3A: AAG <u>A</u> CUAGC                             | hnRNP A2/B1 (12-195)      | 244.5 ± 25.3 nM | 1.19  |
| G3C: AAG <u>C</u> CUAGC                             | hnRNP A2/B1 (12-195)      | 952.4 ± 1.14 nM | 1.1   |
| U6C: AAGGAC <u>C</u> AGC                            | hnRNP A2/B1 (12-195)      | 184.2 ± 16.3 nM | 1.03  |
| U6A: AAGGAC <u>A</u> AGC                            | hnRNP A2/B1 (12-195)      | 204.5 ± 19.9 nM | 0.924 |
| U6G: AAGGAC <u>G</u> AGC                            | hnRNP A2/B1 (12-195)      | 238.1 ± 42.7 nM | 1.08  |
| A7G: AAGGACU <u>G</u> GC                            | hnRNP A2/B1 (12-195)      | 108.2 ± 11.5 nM | 0.919 |
| A7U: AAGGACU <u>U</u> GC                            | hnRNP A2/B1 (12-195)      | 219.8 ± 21.6 nM | 0.904 |
| G8A: AAGGACUA <u>A</u> C                            | hnRNP A2/B1 (12-195)      | 106.6 ± 16.2 nM | 1.01  |
| G8C: AAGGACUA <u>C</u> C                            | hnRNP A2/B1 (12-195)      | 292.4 ± 44.2 nM | 1.04  |
| G8U: AAGGACUA <u>U</u> C                            | hnRNP A2/B1 (12-195)      | 271.7 ± 30.7 nM | 0.954 |
| 10mer:AAGGACUAGC                                    | hnRNP A2/B1 (12-195)Q19A  | 440.5 ± 42.0 nM | 1.19  |
| 10mer:AAGGACUAGC                                    | hnRNP A2/B1 (12-195)F24A  | 456.6 ± 35.5 nM | 1.03  |
| 10mer:AAGGACUAGC                                    | hnRNP A2/B1 (12-195)D49A  | 561.8 ± 69.4 nM | 1.04  |
| 10mer:AAGGACUAGC                                    | hnRNP A2/B1 (12-195)F66A  | 763.4 ± 10.2 nM | 0.952 |
| 10mer:AAGGACUAGC                                    | hnRNP A2/B1 (12-195)E92A  | 751.9 ± 85.5 nM | 1.3   |
| 10mer:AAGGACUAGC                                    | hnRNP A2/B1 (12-195)H108A | 167.2 ± 19.2 nM | 1.21  |
| 10mer:AAGGACUAGC                                    | hnRNP A2/B1 (12-195)K113A | 813.0 ± 1.17 nM | 1.27  |
| 10mer:AAGGACUAGC                                    | hnRNP A2/B1 (12-195)F115A | 781.3 ± 87.7 nM | 1.31  |
| 10mer:AAGGACUAGC                                    | hnRNP A2/B1 (12-195)K120A | 413.2 ± 50.5 nM | 1.2   |
| 10mer:AAGGACUAGC                                    | hnRNP A2/B1 (12-195)F157A | 534.8 ± 97.1 nM | 1.39  |
| 10mer:AAGGACUAGC                                    | hnRNP A2/B1 (12-195)E183A | 289.9 ± 47.8 nM | 1.32  |
| 10mer: AAGGACUAGC                                   | hnRNP A2/B1 (1-353)       | 103.3 ± 8.93 nM | 0.555 |
| 10mer-m <sup>6</sup> A: AAGG(m <sup>6</sup> A)CUAGC | hnRNP A2/B1 (1-353)       | 171.5 ± 25.6 nM | 0.523 |
| 10mer: AAGGACUAGC                                   | hnRNP A2/B1 (1-249)       | 26.5 ± 1.8 nM   | 1.05  |
| 10mer-m <sup>6</sup> A: AAGG(m <sup>6</sup> A)CUAGC | hnRNP A2/B1 (1-249)       | 176.1 ± 25.3 nM | 1.19  |
| 8mer: AGGACUGC                                      | hnRNP A2/B1 (1-249)       | 465.1 ± 53.2 nM | 0.866 |
| 8mer-m <sup>6</sup> A: AGG(m <sup>6</sup> A)CUGC    | hnRNP A2/B1 (1-249)       | 505.1 ± 44.2 nM | 0.795 |

**Supplementary Table 3. Potential targets for hnRNP A2/B1.**

---

|                                     |                                   |
|-------------------------------------|-----------------------------------|
| A2RE: 5'-GCCAAGGAGCCAGAGAGCAUG-3'   | (JBC, 1999) <sup>1</sup>          |
| A2RE11: 5'-GCCAAGGAGCC-3'           | (JBC, 1999) <sup>1</sup>          |
| CLIP-seq: 5'-GGUAGUAG-3',           | (Cell Reports, 2012) <sup>2</sup> |
| CLIP-seq: 5'-AGG(A/U)U(A/C/U)G(A/G) |                                   |
| 5'-UAASUUUAU-3'                     | (Gene & Dev. 2016) <sup>3</sup>   |
| 5'-UAG(A/G)-3'                      | (Neuron, 2016) <sup>4</sup>       |
| HOTAIR: Purine-rich                 | (RNA, 2016) <sup>5</sup>          |
| 5'-UAGGG-3'                         | (Nature, 2013) <sup>6</sup>       |
| 5'-GG(m6A)CU-3'                     | (Cell, 2015) <sup>7</sup>         |
| 5'-GAGG-3'                          | (Nat. Comms. 2013) <sup>8</sup>   |

---

### Supplementary References

1. Munro, T.P. et al. Mutational analysis of a heterogeneous nuclear ribonucleoprotein A2 response element for RNA trafficking. *J Biol Chem* **274**, 34389-95 (1999).
2. Huelga, S.C. et al. Integrative genome-wide analysis reveals cooperative regulation of alternative splicing by hnRNP proteins. *Cell Rep* **1**, 167-78 (2012).
3. Geissler, R. et al. A widespread sequence-specific mRNA decay pathway mediated by hnRNPs A1 and A2/B1. *Genes Dev* **30**, 1070-85 (2016).
4. Hutten, S. & Dormann, D. hnRNPA2/B1 Function in Neurodegeneration: It's a Gain, Not a Loss. *Neuron* **92**, 672-674 (2016).
5. Meredith, E.K., Balas, M.M., Sindy, K., Haislop, K. & Johnson, A.M. An RNA matchmaker protein regulates the activity of the long noncoding RNA HOTAIR. *RNA* **22**, 995-1010 (2016).
6. Ray, D. et al. A compendium of RNA-binding motifs for decoding gene regulation. *Nature* **499**, 172-7 (2013).
7. Alarcon, C.R. et al. HNRNPA2B1 Is a Mediator of m(6)A-Dependent Nuclear RNA Processing Events. *Cell* **162**, 1299-308 (2015).
8. Villarroya-Beltri, C. et al. Sumoylated hnRNPA2B1 controls the sorting of miRNAs into exosomes through binding to specific motifs. *Nat Commun* **4**, 2980 (2013).
